# Supplementary material
Source: MDPI journal article supplement (https://www.mdpi.com/2073-4395/12/6/1342)
Supplement: s1 [file s1]

# The more fractal the architecture the more intensive the color of flower: a superpixel-wise analysis towards high-throughput phenotyping

Jardel da Silva Souza <sup>1,\*</sup>, Laura Monteiro Pedrosa <sup>2</sup>, Bruno Rafael de Almeida Moreira <sup>1</sup>, Elizanilda Ramalho do Rêgo <sup>2</sup> and Sandra Helena Unêda-Trevisoli <sup>1</sup>

<sup>1</sup> School of Agricultural and Veterinary Sciences, São Paulo State University (Unesp), Jaboticabal, São Paulo, Brazil, 14884-900; b.moreira@unesp.br (B.R.d.A.M.); shu.trevisoli@unesp.br (S.H.U.T.)

<sup>2</sup> Center for Agricultural Sciences, Federal University of Paraíba (UFPB), Areia, Paraíba, Brazil, 58397-000; pedrosamlaura@gmail.com (L.M.P.); elizanilda@cca.ufpb.br (E.R.d.R.)

\* Correspondence: jardel.souza@unesp.br.

## Supplementary data

**Table S1.** Principal components analysis for the pixel-wise intensity-fractality

| Key                               | Latent hit                                 |                                                           |
|-----------------------------------|--------------------------------------------|-----------------------------------------------------------|
|                                   | PC <sub>I</sub> , Architecture compactness | PC <sub>II</sub> , Pixel-wise intensity of flower's color |
| Eigenvalue                        | 1.35*                                      | 1.10*                                                     |
| Percentage of variance            | 51.80                                      | 31.60                                                     |
| Cumulative percentage of variance | 51.80                                      | 83.40                                                     |
| Loading                           |                                            |                                                           |
| Corolla                           | 0.95 *                                     | 0.85 *                                                    |
| Petal                             | 0.90 *                                     | 0.75 *                                                    |
| Filament                          | 0.80 *                                     | 0.70 *                                                    |
| Anther                            | 0.80 *                                     | -0.65 *                                                   |
| Fractal dimension of architecture | -0.70 *                                    | -0.75 *                                                   |
| Percentage contribution           |                                            |                                                           |
| Corolla                           | 35.10                                      | 40.50                                                     |
| Petal                             | 24.50                                      | 31.20                                                     |
| Filament                          | 12.50                                      | 5.20                                                      |
| Anther                            | 5.90                                       | 3.80                                                      |
| Fractal dimension of architecture | 22.00                                      | 19.30                                                     |

nexus in processing imagery data on *P. umbraticola*.

Significant code: \* *p*-value < 0.05.
